# Supplementary material
Source: Springer Nature journal article supplement (https://www.springermedizin.de/resource/supplementary/12967_2012_1091_MOESM3_ESM.pdf/9573244)

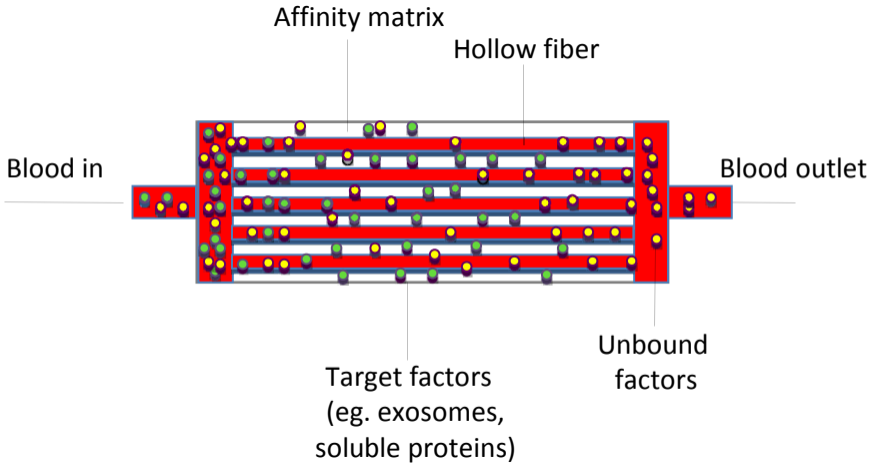

Supplement: MOESM3 [file 9573244]
